# Supplementary material for: The first near-complete assembly of the hexaploid bread wheat genome, Triticum aestivum
Source: PubMed Central journal article supplement (PMC5691383; doi:10.1093/gigascience/gix097), 2017-10-23

# GigaScience

## The first near-complete assembly of the hexaploid bread wheat genome, *Triticum aestivum* --Manuscript Draft--

|                                                                               |                                                                                                                                                                                                                                                                                                                                                                                                                                                                                                                                                                                                                                                                                                                                                                                                                                                                                                                                                                                                                                                           |                        |
|-------------------------------------------------------------------------------|-----------------------------------------------------------------------------------------------------------------------------------------------------------------------------------------------------------------------------------------------------------------------------------------------------------------------------------------------------------------------------------------------------------------------------------------------------------------------------------------------------------------------------------------------------------------------------------------------------------------------------------------------------------------------------------------------------------------------------------------------------------------------------------------------------------------------------------------------------------------------------------------------------------------------------------------------------------------------------------------------------------------------------------------------------------|------------------------|
| <b>Manuscript Number:</b>                                                     | GIGA-D-17-00164                                                                                                                                                                                                                                                                                                                                                                                                                                                                                                                                                                                                                                                                                                                                                                                                                                                                                                                                                                                                                                           |                        |
| <b>Full Title:</b>                                                            | The first near-complete assembly of the hexaploid bread wheat genome, <i>Triticum aestivum</i>                                                                                                                                                                                                                                                                                                                                                                                                                                                                                                                                                                                                                                                                                                                                                                                                                                                                                                                                                            |                        |
| <b>Article Type:</b>                                                          | Data Note                                                                                                                                                                                                                                                                                                                                                                                                                                                                                                                                                                                                                                                                                                                                                                                                                                                                                                                                                                                                                                                 |                        |
| <b>Funding Information:</b>                                                   | Directorate for Biological Sciences (IOS-1238231)                                                                                                                                                                                                                                                                                                                                                                                                                                                                                                                                                                                                                                                                                                                                                                                                                                                                                                                                                                                                         | Not applicable         |
|                                                                               | Directorate for Biological Sciences (IOS-1444893)                                                                                                                                                                                                                                                                                                                                                                                                                                                                                                                                                                                                                                                                                                                                                                                                                                                                                                                                                                                                         | Dr. Aleksey V. Zimin   |
|                                                                               | National Human Genome Research Institute (R01HG006677)                                                                                                                                                                                                                                                                                                                                                                                                                                                                                                                                                                                                                                                                                                                                                                                                                                                                                                                                                                                                    | Dr. Steven L. Salzberg |
| <b>Abstract:</b>                                                              | <p>Common bread wheat, <i>Triticum aestivum</i>, has one of the most complex genomes known to science, with 6 copies of each chromosome, enormous numbers of near-identical sequences scattered throughout, and an overall size of more than 15 billion bases. Multiple past attempts to assemble the genome have failed. Here we report the first successful assembly of <i>T. aestivum</i>, using deep sequencing coverage from a combination of short Illumina reads and very long Pacific Biosciences reads. The final assembly contains 15,343,750,409 bases and has a weighted average (N50) contig size of 232,613 bases. This represents by far the most complete and contiguous assembly of the wheat genome to date, providing a strong foundation for future genetic studies of this important food crop. We also report how we used the recently published genome of <i>Aegilops tauschii</i>, the diploid ancestor of the wheat D genome, to identify 4,179,762,575 bp of <i>T. aestivum</i> that correspond to its D genome components.</p> |                        |
| <b>Corresponding Author:</b>                                                  | Steven L. Salzberg, Ph.D.<br>Johns Hopkins University<br>Baltimore, MD UNITED STATES                                                                                                                                                                                                                                                                                                                                                                                                                                                                                                                                                                                                                                                                                                                                                                                                                                                                                                                                                                      |                        |
| <b>Corresponding Author Secondary Information:</b>                            |                                                                                                                                                                                                                                                                                                                                                                                                                                                                                                                                                                                                                                                                                                                                                                                                                                                                                                                                                                                                                                                           |                        |
| <b>Corresponding Author's Institution:</b>                                    | Johns Hopkins University                                                                                                                                                                                                                                                                                                                                                                                                                                                                                                                                                                                                                                                                                                                                                                                                                                                                                                                                                                                                                                  |                        |
| <b>Corresponding Author's Secondary Institution:</b>                          |                                                                                                                                                                                                                                                                                                                                                                                                                                                                                                                                                                                                                                                                                                                                                                                                                                                                                                                                                                                                                                                           |                        |
| <b>First Author:</b>                                                          | Aleksey V. Zimin, Ph.D.                                                                                                                                                                                                                                                                                                                                                                                                                                                                                                                                                                                                                                                                                                                                                                                                                                                                                                                                                                                                                                   |                        |
| <b>First Author Secondary Information:</b>                                    |                                                                                                                                                                                                                                                                                                                                                                                                                                                                                                                                                                                                                                                                                                                                                                                                                                                                                                                                                                                                                                                           |                        |
| <b>Order of Authors:</b>                                                      | Aleksey V. Zimin, Ph.D.                                                                                                                                                                                                                                                                                                                                                                                                                                                                                                                                                                                                                                                                                                                                                                                                                                                                                                                                                                                                                                   |                        |
|                                                                               | Daniela Puiu, M.S.                                                                                                                                                                                                                                                                                                                                                                                                                                                                                                                                                                                                                                                                                                                                                                                                                                                                                                                                                                                                                                        |                        |
|                                                                               | Richard Hall, Ph.D.                                                                                                                                                                                                                                                                                                                                                                                                                                                                                                                                                                                                                                                                                                                                                                                                                                                                                                                                                                                                                                       |                        |
|                                                                               | Sarah Kingan, Ph.D.                                                                                                                                                                                                                                                                                                                                                                                                                                                                                                                                                                                                                                                                                                                                                                                                                                                                                                                                                                                                                                       |                        |
|                                                                               | Bernardo Clavijo                                                                                                                                                                                                                                                                                                                                                                                                                                                                                                                                                                                                                                                                                                                                                                                                                                                                                                                                                                                                                                          |                        |
|                                                                               | Steven L. Salzberg, Ph.D.                                                                                                                                                                                                                                                                                                                                                                                                                                                                                                                                                                                                                                                                                                                                                                                                                                                                                                                                                                                                                                 |                        |
| <b>Order of Authors Secondary Information:</b>                                |                                                                                                                                                                                                                                                                                                                                                                                                                                                                                                                                                                                                                                                                                                                                                                                                                                                                                                                                                                                                                                                           |                        |
| <b>Opposed Reviewers:</b>                                                     |                                                                                                                                                                                                                                                                                                                                                                                                                                                                                                                                                                                                                                                                                                                                                                                                                                                                                                                                                                                                                                                           |                        |
| <b>Additional Information:</b>                                                |                                                                                                                                                                                                                                                                                                                                                                                                                                                                                                                                                                                                                                                                                                                                                                                                                                                                                                                                                                                                                                                           |                        |
| <b>Question</b>                                                               | <b>Response</b>                                                                                                                                                                                                                                                                                                                                                                                                                                                                                                                                                                                                                                                                                                                                                                                                                                                                                                                                                                                                                                           |                        |
| Are you submitting this manuscript to a special series or article collection? | No                                                                                                                                                                                                                                                                                                                                                                                                                                                                                                                                                                                                                                                                                                                                                                                                                                                                                                                                                                                                                                                        |                        |

|                                                                                                                                                                                                                                                                                                                                                                                                                                                                                                                                                         |            |
|---------------------------------------------------------------------------------------------------------------------------------------------------------------------------------------------------------------------------------------------------------------------------------------------------------------------------------------------------------------------------------------------------------------------------------------------------------------------------------------------------------------------------------------------------------|------------|
| <p><b>Experimental design and statistics</b></p> <p>Full details of the experimental design and statistical methods used should be given in the Methods section, as detailed in our <a href="#">Minimum Standards Reporting Checklist</a>. Information essential to interpreting the data presented should be made available in the figure legends.</p> <p>Have you included all the information requested in your manuscript?</p>                                                                                                                      | <p>Yes</p> |
| <p><b>Resources</b></p> <p>A description of all resources used, including antibodies, cell lines, animals and software tools, with enough information to allow them to be uniquely identified, should be included in the Methods section. Authors are strongly encouraged to cite <a href="#">Research Resource Identifiers</a> (RRIDs) for antibodies, model organisms and tools, where possible.</p> <p>Have you included the information requested as detailed in our <a href="#">Minimum Standards Reporting Checklist</a>?</p>                     | <p>Yes</p> |
| <p><b>Availability of data and materials</b></p> <p>All datasets and code on which the conclusions of the paper rely must be either included in your submission or deposited in <a href="#">publicly available repositories</a> (where available and ethically appropriate), referencing such data using a unique identifier in the references and in the “Availability of Data and Materials” section of your manuscript.</p> <p>Have you have met the above requirement as detailed in our <a href="#">Minimum Standards Reporting Checklist</a>?</p> | <p>Yes</p> |

# 1      1    **The first near-complete assembly of the hexaploid bread wheat genome,** 2      2    ***Triticum aestivum***

3      3    Aleksey V. Zimin<sup>1,2</sup>, Daniela Puiu<sup>1</sup>, Richard Hall<sup>3</sup>, Sarah Kingan<sup>3</sup>, Bernardo J. Clavijo<sup>4</sup>, and  
4      4    Steven L. Salzberg<sup>1,5,\*</sup>

5      5  
6      6    <sup>1</sup>Center for Computational Biology, McKusick-Nathans Institute of Genetic Medicine, Johns Hopkins  
7      7    University School of Medicine, Baltimore, MD

8      8    <sup>2</sup>Institute for Physical Sciences and Technology, University of Maryland, College Park, MD

9      9    <sup>3</sup>Pacific Biosciences, Menlo Park, CA

10     10    <sup>4</sup>Earlham Institute, Norwich NR4 7UZ, United Kingdom

11     11    <sup>5</sup>Departments of Biomedical Engineering, Computer Science, and Biostatistics, Johns Hopkins  
12     12    University, Baltimore, MD

13     13    \*To whom correspondence should be addressed: [salzberg@jhu.edu](mailto:salzberg@jhu.edu).

## 14 15     15    **Abstract**

16     16    Common bread wheat, *Triticum aestivum*, has one of the most complex genomes known to  
17     17    science, with 6 copies of each chromosome, enormous numbers of near-identical sequences  
18     18    scattered throughout, and an overall size of more than 15 billion bases. Multiple past attempts to  
19     19    assemble the genome have failed. Here we report the first successful assembly of *T. aestivum*,  
20     20    using deep sequencing coverage from a combination of short Illumina reads and very long  
21     21    Pacific Biosciences reads. The final assembly contains 15,344,693,583 bases and has a weighted  
22     22    average (N50) contig size of of 232,659 bases. This represents by far the most complete and  
23     23    contiguous assembly of the wheat genome to date, providing a strong foundation for future  
24     24    genetic studies of this important food crop. We also report how we used the recently published  
25     25    genome of *Aegilops tauschii*, the diploid ancestor of the wheat D genome, to identify  
26     26    4,179,762,575 bp of *T. aestivum* that correspond to its D genome components.

## 27 28     28    **Introduction**

29     29    For many years, the hexaploid (AABBDD) bread wheat genome, *Triticum aestivum*, has resisted  
30     30    efforts to sequence and assemble it. The first effort to sequence the genome, published in 2012

1  
2  
3  
4  
5  
6  
7  
8  
9  
10  
11  
12  
13  
14  
15  
16  
17  
18  
19  
20  
21  
22  
23  
24  
25  
26  
27  
28  
29  
30  
31  
32  
33  
34  
35  
36  
37  
38  
39  
40  
41  
42  
43  
44  
45  
46  
47  
48  
49  
50  
51  
52  
53  
54  
55  
56  
57  
58  
59  
60  
61  
62  
63  
64  
65

[1], used an earlier generation of sequencing technology and only assembled 5.42 billion bases (Gbp), approximately one-third of the genome. In a second attempt two years later, an international consortium published the results of a systematic effort to sequence the genome one chromosome at a time, using deep coverage in 100-bp Illumina reads [2]. That effort, although more successful than the previous one, yielded only 10.2 billion bases of sequence, approximately two-thirds of the genome. The contiguity of this assembly was quite poor, with the 10.2 billion bases divided amongst hundreds of thousands of contigs, and with N50 sizes ranging from 1.7 to 8.9 kilobases (Kb) for the different chromosome arms. In 2017, a third assembly of wheat was published, estimated to represent 78% of the genome [3]. This assembly contained 12.7 billion bases of sequence, but it too was highly fragmented, containing over 2.7 million contigs with an N50 contig size of 9,731 bp.

The wheat genome's complexity, and the challenge it presents for genome assembly, stems not only from its large size (five times the size of the human genome), but also from its very high proportion of relatively long, near-identical repeats, most of them due to transposable elements [4]. Because these repeats are much longer than the length of Illumina reads, efforts to assemble the genome using Illumina data have been unable to resolve these repeats. Another major challenge in assembling the wheat genome is that it is hexaploid, and the three component genomes—wheat A, B, and D, each comprising seven chromosomes—share many regions of high similarity. Genome assembly programs are thus faced with a doubly complex problem: first that the genome is unusually repetitive, and second that each chromosome exists in six copies with varying degrees of intra- and inter-chromosome similarity.

1  
2  
3  
4 54 The most effective way to resolve repeats is to generate individual reads that contain them. If a  
5  
6 55 single read is longer than a repeat, and if both ends of the read contain unique sequences, then  
7  
8  
9 56 genome assemblers can unambiguously place the repeat in the correct location. Without such  
10  
11 57 reads, every long repeat creates a breakpoint in the assembly. Recent advances in sequencing,  
12  
13  
14 58 particularly the long read, single-molecule sequencing technologies from Pacific Biosciences  
15  
16 59 (PacBio) and Oxford Nanopore, can produce reads in excess of 10,000 bp, although with a high  
17  
18  
19 60 error rate. By combining these very long reads with highly accurate shorter reads, we have been  
20  
21 61 able to produce an assembly of the wheat genome that is dramatically better than any previous  
22  
23 62 attempt. Ours is the first assembly that contains essentially the entire length of the genome, with  
24  
25  
26 63 more than 15.3 billion bases, and its contiguity is more than *ten times* better than the partial  
27  
28  
29 64 assemblies published in the past.  
30

31 65

## 32 33 66 **Results**

34  
35  
36 67 To create the wheat genome assembly, we generated two extremely large primary data sets. The  
37  
38 68 first data set consisted of 7.06 billion Illumina reads containing approximately 1 trillion bases of  
39  
40  
41 69 DNA. The Illumina reads were 150-bp, paired reads from short DNA fragments, averaging 400  
42  
43  
44 70 bp in length. Using an estimated genome size of 15.3 Gbp, this represented 65-fold coverage of  
45  
46 71 the genome. The second data set used Pacific Biosciences single-molecule (SMRT) technology  
47  
48 72 to generate 55.5 million reads with an average read length just under 10,000 bp, containing a  
49  
50  
51 73 total of 545 billion bases of DNA, representing 36-fold coverage of the genome. All reads were  
52  
53 74 generated from the Chinese spring variety (CS42, accession Dv418) of *T. aestivum*, the same  
54  
55  
56 75 variety as used in earlier attempts to sequence the genome.  
57

58 76  
59  
60  
61  
62  
63  
64  
65

## 77 **MaSuRCA assembly**

78 To create the initial assembly, Triticum 1.0, we ran the MaSuRCA assembler (v. 3.2.1) on the  
79 full data set of Illumina and PacBio reads. The first major step was the creation of super-reads  
80 [5] from the Illumina reads. Super-reads are highly accurate and longer than the original reads,  
81 and because they are much fewer in number, they provide a means to greatly compress the  
82 original data. This step generated 95.7 million super-reads with a total length of 31 Gb, a mean  
83 size of 324 bp and an N50 size of 474 bp (i.e., half of the total super-read sequence was  
84 contained in super-reads of 474 bp or longer). The super-reads provided a 32-fold compression  
85 of the original Illumina data.

86  
87 Next we created *mega-reads* by using the super-reads to tile the PacBio reads, effectively  
88 replacing most PacBio reads (which have an average error rate of ~15%) with much more  
89 accurate sequences [6]. Most PacBio reads were converted into a single mega-read, but in some  
90 cases a given PacBio read yielded two or more (shorter) mega-reads. In total we created  
91 57,020,767 mega-reads with a mean length of 4,876 bp and an N50 length of 8,427 bp. The total  
92 length of the mega-reads was 278 Gb, representing about 18X genome coverage. As part of this  
93 step, we also created synthetic mate pairs; these link together two mega-reads when the pair of  
94 mega-reads originates from a single PacBio read. We generated these pairs by extracting 400 bp  
95 from opposite ends of each pair of consecutive mega-reads corresponding to a given PacBio  
96 read. This resulted in 23.45 million pairs of 400 bp reads, totalling 18.75 Gb.

97  
98 Construction of super-reads and mega-reads required approximately 100,000 CPU hours, of  
99 which 95% was spent in the mega-reads step. By using large multi-core computers to run these

1  
2  
3  
4 100 steps in parallel, these steps took 1.5 months of elapsed (wall clock) time. The peak memory  
5  
6 101 (RAM) usage was 1.2 terabytes.  
7  
8

9 102  
10  
11 103 We then assembled the mega-reads and the synthetic pairs using the Celera Assembler [7] (v8.3),  
12  
13 104 which was modified to work with our parallel job scheduling system. The CA assembly process  
14  
15 105 required many iterations of the overlapping, error correction, and contig construction steps, and it  
16  
17 106 was extremely time consuming, even with the many optimizations that have been incorporated in  
18  
19 107 this assembler in recent releases. The total CPU time was ~470,000 CPU hours (53.7 years),  
20  
21 108 which was only made feasible by running it on a grid with thousands of jobs running in parallel  
22  
23 109 for some of the major steps. The total elapsed time was just over 5 months. When combined with  
24  
25 110 the earlier steps, the entire assembly process took 6.5 months. The resulting assembly, labelled  
26  
27 111 Triticum 1.0, contained 17.046 Gb in 829,839 contigs, with an N50 contig size of 76,267 bp and  
28  
29 112 an N50 scaffold size of 101,195 bp (**Table 1**).  
30  
31  
32  
33  
34  
35  
36 113

37  
38  
39 **Table 1.** Assembly statistics for each of the assemblies of *Triticum aestivum* constructed as  
40 described in the text. To enable fair comparisons, all N50 sizes are computed using an estimated  
41 genome size of 15.34 Gb.

| Assembly        | Element type  | Number  | Total size (bp) | Average size (bp) | N50 size (bp) |
|-----------------|---------------|---------|-----------------|-------------------|---------------|
| Triticum 1.0    | contigs       | 829,839 | 17,045,571,778  | 20,541            | 76,267        |
|                 | scaffolds>2Kb | 576,137 | 16,889,295,941  | 29,314            | 101,195       |
| Triticum 2.0    | contigs       | 375,328 | 14,395,027,822  | 38,353            | 75,599        |
|                 | scaffolds>2Kb | 252,501 | 14,412,484,332  | 57,078            | 100,805       |
| FALCON Trit 1.0 | contigs       | 97,809  | 12,939,100,857  | 132,289           | 215,314       |
| Triticum 3.0    | contigs       | 279,439 | 15,343,711,528  | 54,908            | 232,613       |
| Triticum 3.1    | contigs       | 279,439 | 15,344,693,583  | 54,912            | 232,659       |

52 114 Next, in order to detect and remove redundant regions of the assembly, we aligned the assembly  
53  
54 115 against itself using the nucmer program from the MUMmer package [8]. We identified and  
55  
56 116 excluded scaffolds that were completely contained in and  $\geq 96\%$  identical to other scaffolds.  
57  
58  
59 117 After this de-duplication procedure, the reduced assembly, Triticum 2.0, contained 14.40 Gbp in  
60  
61  
62  
63  
64  
65

1  
2  
3  
4 118 375,328 contigs with an N50 contig size of 75,599 bp, with scaffolds spanning 14.45 Gbp and an  
5  
6  
7 119 N50 scaffold size of 100,805 bp (**Table 1**).

8  
9 120

## 11 121 **FALCON assembly**

13  
14 122 Independently of the MaSuRCA assembly, we assembled the PacBio data alone using the  
15  
16 123 FALCON assembler [9], followed by polishing with the Arrow program, which substantially  
17  
18  
19 124 improves the consensus accuracy. FALCON implements a hierarchical assembly approach; the  
20  
21 125 initial step is to error correct long reads by aligning all reads to a subset of the longest reads.  
22  
23 126 Given the relatively low raw read coverage (36X), we used a long-read cutoff of 1 Kb,  
24  
25  
26 127 generating 11X coverage of error-corrected reads with an N50 size of 16 Kb. Error correction  
27  
28  
29 128 and assembly of the corrected reads was completed using ~150,000 CPU hours, which took ~3  
30  
31 129 weeks on a 16-node cluster. The contigs output from FALCON require further polishing, which  
32  
33 130 involves realignment of raw reads and calculation of a new consensus [10]. For the polishing  
34  
35  
36 131 step, we used Pacbio's resequencing pipeline from the SMRT Analysis package  
37  
38 132 (<https://github.com/PacificBiosciences/SMRT-Link>) after first splitting the assembled contigs  
39  
40  
41 133 into <4 Gbp chunks (a limit of the aligner). Polishing required an additional ~160,000 CPU  
42  
43 134 hours, for a total of 310,000 CPU hours and 6 weeks elapsed (wall clock) time.

44  
45 135

46  
47  
48 136 These steps produced an assembly, designated FALCON Trit 1.0, containing 12.94 Gbp in  
49  
50 137 97,809 contigs with a mean size of 132,289 and an N50 size of 215,314 bp (**Table 1**).

51  
52 138

## 53 139 **Merged assembly**

54  
55  
56  
57  
58  
59  
60  
61  
62  
63  
64  
65



1  
2  
3  
4 140 The contigs from the FALCON assembly were larger than those from the MaSuRCA assembly;  
5  
6  
7 141 however, the total size of the assembly was 1.5 Gbp smaller. To capture the advantages of both  
8  
9 142 assemblies, we merged them as follows. We aligned the contigs (not scaffolds) from the two  
10  
11

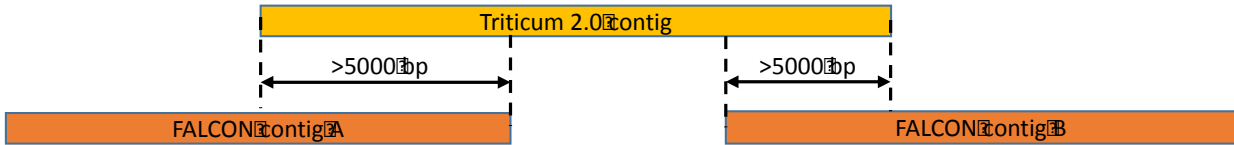

12  
13  
14  
15  
16  
17  
18 **Figure 1.** Illustration of the merging process for the Triticum 2.0 and FALCON Trit 1.0 assemblies. If two  
19 contigs A and B from the FALCON assembly overlapped a Triticum 2.0 contig by at least 5000 bp, then A  
20 and B were merged together, using the Triticum 2.0 contig to fill the gap.  
21

22 143 assemblies using MUMmer 4.0 [8] and extracted all pairwise best matches. We then merged  
23  
24  
25 144 each pair of FALCON contigs when they overlapped a single Triticum 2.0 contig by at least  
26  
27 145 5000 bp, with Triticum 2.0 sequence filling the gap (see **Figure 1**).  
28  
29

30 146  
31  
32 147 After merging and extending the FALCON contigs, we then identified all MaSuRCA scaffolds  
33  
34 148 that were not contained in the longer FALCON contigs, and added these to the new assembly.  
35  
36  
37 149 The resulting merged assembly, Triticum 3.0, contains 15,343,750,409 bp in 279,529 contigs,  
38  
39 150 with a contig N50 size of 232,613 bp (**Table 1**). The longest contig is 4,510,883 bp.  
40  
41

## 42 151 **Genome complexity**

43  
44  
45  
46 153 As described above, previous attempts to assemble the hexaploid wheat genome were stymied  
47  
48  
49 154 because of its exceptionally high repetitiveness, but until now we had no reliable way to quantify  
50  
51 155 how repetitive the genome truly is. To answer this question with a precise metric, we computed  
52  
53  
54 156 the k-mer uniqueness ratio, a metric defined earlier as a way to capture repetitiveness that  
55  
56  
57 157 reflects the difficulty of assembly [11]. This ratio is defined as the percentage of a genome that is  
58  
59 158 covered by unique sequences of length  $k$  or longer. If, for example, 90% of a genome is  
60  
61  
62  
63  
64  
65

1  
2  
3  
4 159 comprised of unique 50-mers, then one might expect that 90% of that genome could be  
5  
6  
7 160 assembled using accurate (low-error-rate) reads that were longer than 50 bp.  
8  
9 161

10  
11 162 With the *Triticum 3.0* assembly in hand, we computed the k-mer uniqueness ratio for wheat and  
12  
13  
14 163 compared it to several other plant and animal genomes, as shown in **Figure 2**. As the figure  
15  
16 164 illustrates, for any value of k, a much smaller percentage of the wheat genome is covered by  
17  
18  
19 165 unique k-mers than other plant and animal genomes, with the exception of *Ae. tauschii*, which as  
20  
21 166 expected (because it is near-identical to the D genome of hexaploid *T. aestivum*) is only slightly  
22  
23  
24 167 less repetitive. For example, only 44% of the 64-mers in the wheat genome are unique, as  
25  
26 168 contrasted with 90% of the 64-mers in cow and 81% of the 64-mers in rice. This analysis  
27  
28  
29 169 demonstrates that in order to obtain an assembly covering most of the wheat genome,  
30  
31 170 particularly if the algorithm relies on de Bruijn graphs, much longer reads will be required. Our  
32  
33  
34  
35

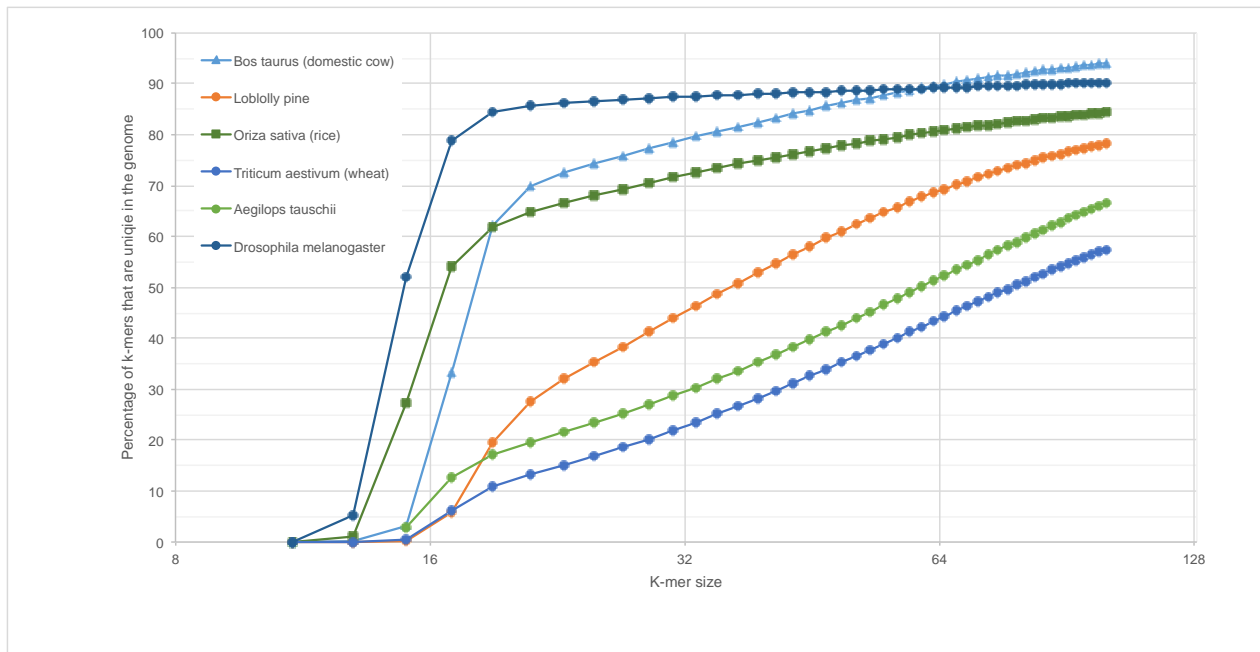

36  
37  
38  
39  
40  
41  
42  
43  
44  
45  
46  
47  
48  
49  
50  
51  
52  
53  
54  
55  
56  
57 **Figure 2.** K-mer uniqueness ratios for the wheat genome (*Triticum aestivum*) compared to the  
58 cow, fruit fly, rice, loblolly pine, and *Ae. tauschii* genomes. The plot shows the percentage of  
59 each genome that is covered (y-axis) by unique sequences of length k, for various values of k (x-  
60 axis).  
61  
62  
63  
64  
65

1  
2  
3  
4 171 sequencing strategy, by using deep coverage in very long PacBio reads coupled with highly  
5  
6 172 accurate Illumina reads, was able to produce the long, accurate reads required to assemble this  
7  
8  
9 173 very complex genome.

10  
11 174

### 14 175 **Identifying the wheat D genome**

15  
16 176 *T. aestivum* is a hexaploid plant with three diploid ancestors, one of which is *Aegilops tauschii*,  
17  
18  
19 177 commonly known as goat grass. *Ae. tauschii* itself is a highly repetitive genome that has resisted  
20  
21 178 attempts at assembly, but we recently published a highly contiguous draft assembly (Aet\_MR  
22  
23  
24 179 1.0) using a similar strategy to the one used for wheat, a combination of PacBio and Illumina  
25  
26 180 sequences [6]. *T. aestivum*'s hexaploid composition is typically represented as AABBDD, where  
27  
28  
29 181 the D genome was contributed by an ancestor of *Ae. tauschii*. The hexaploidization event  
30  
31 182 occurred very recently, approximately 8,000 years ago, when *Ae. tauschii* spontaneously  
32  
33 183 hybridized with a tetraploid wheat species, *Triticum turgidum* [12].  
34  
35

36 184

37  
38 185 Because this event was so recent, the wheat D genome and *Ae. tauschii* are highly similar, much  
39  
40  
41 186 closer to one another than the D genome is to either the A or B genomes. We used this similarity  
42  
43 187 to identify the D genome components of our assembly by aligning the *Ae. tauschii* contigs in  
44  
45  
46 188 Aet\_MR 1.0 to Triticum 3.0. We used the nucmer program [8] to identify all alignments  
47  
48 189 representing best matches between Triticum 3.0 and Aet\_MR 1.0 with a minimum identity of  
49  
50  
51 190 97%. The vast majority of the two genomes are >99% identical, making this filtering process  
52  
53 191 relatively straightforward.

54  
55 192  
56  
57  
58  
59  
60  
61  
62  
63  
64  
65

1  
2  
3  
4 193 After filtering, we identified 50,101 contigs with a total length of 4,179,762,575 bp from  
5  
6 194 Triticum 3.0 that aligned to *Ae. tauschii*. We separated these D genome contigs from Triticum  
7  
8  
9 195 3.0 and provided them as the first release of the wheat D genome, which we have named  
10  
11 196 TriticumD 1.0. The N50 size of these contigs is 224,953 bp, using a genome size estimate of 4.18  
12  
13  
14 197 Gb for wheat D. The total size of 4.18 Gb corresponds closely to the 4.33 Gb in the recently  
15  
16 198 published *Ae. tauschii* (Aet\_MR 1.0) assembly [6].  
17  
18

19 199  
20  
21 200 We also ran the alignments in the other direction, aligning all of Aet\_MR 1.0 to TriticumD 1.0,  
22  
23 201 and found that 99.8% of the *Ae. tauschii* assembly matches TriticumD; only 8.96 Mb failed to  
24  
25 202 align. The overall mapping is complex; although most of the *Ae. tauschii* and wheat D genomes  
26  
27 203 align in a 1-to-1 mapping, many scaffolds align in a many-to-one or one-to-many arrangement.  
28  
29 204 Thus the additional 150 Mb in *Ae. tauschii* appears to be due to gain/loss of repeats rather than  
30  
31 205 loss of unique sequence from wheat D.  
32  
33  
34  
35

36 206  
37  
38 207 **Assembly quality.** Assessing the quality of an assembly is challenging, especially when the  
39  
40 208 previous assemblies are so much more fragmented, as they are in the case of *T. aestivum*.  
41  
42 209 However, the very high-fidelity alignments between Triticum 3.0 and the published *Ae. tauschii*  
43  
44 210 genome, at over 99% identity, provide strong support for its accuracy. We found no large-scale  
45  
46 211 structural disagreements between the assemblies, other than the many-to-one mappings for some  
47  
48 212 of the scaffolds. These could indicate that one assembly has over-collapsed a repeat, but they  
49  
50 213 could also indicate a true polymorphism; we do not have sufficient data to distinguish these  
51  
52 214 possibilities. The fact that 99.8% of *Ae. tauschii* aligns to Triticum 3.0 supports the hypothesis  
53  
54 215 that the assembly is largely complete as well.  
55  
56  
57  
58  
59

60 216  
61  
62  
63  
64  
65

1  
2  
3  
4  
5  
6  
7  
8  
9  
10  
11  
12  
13  
14  
15  
16  
17  
18  
19  
20  
21  
22  
23  
24  
25  
26  
27  
28  
29  
30  
31  
32  
33  
34  
35  
36  
37  
38  
39  
40  
41  
42  
43  
44  
45  
46  
47  
48  
49  
50  
51  
52  
53  
54  
55  
56  
57  
58  
59  
60  
61  
62  
63  
64  
65

217 **Re-polishing to create Triticum 3.1**

218 Finally, we used an independent set of Illumina 250-bp reads from an earlier study [3] to  
219 measure the quality of the consensus sequence. We used the KAT program [13] to count all 31-  
220 mers in each assembly and compare these counts to the 31-mers in the read data. Because the  
221 read data here represented 30-fold coverage of the genome, 31-mers that occur approximately 30  
222 times should represent unique sequences; i.e., they are expected to occur exactly once in the  
223 assembly.

224  
225 The KAT analysis revealed that the FALCON Trit 1.0 assembly was missing a relatively large  
226 number of 31-mers that occurred in the reads (**Figure 3**), while the Triticum 2.0 assembly was  
227 missing far fewer of these 31-mers. The Triticum 3.0 assembly, which used the polished  
228 FALCON assembly for most of its consensus sequence, was also missing many 31-mers. The  
229 mostly likely explanation for this effect is that the polishing process over-corrected by replacing  
230 some 31-mers with near-identical ones. This would have the effect of creating an excess of 31-  
231 mers that occur exactly twice in the assembly, although their coverage indicated that they should  
232 occur once. The KAT analysis confirmed this expectation (data not shown).

233  
234 We also observed that Triticum 2.0, which used MaSuRCA to create the consensus from  
235 Illumina reads, had far fewer missing 31-mers. We therefore re-polished Triticum 3.0 by aligning  
236 it to Triticum 2.0, extracting the mutual best matches, and then using the 2.0 sequence as the  
237 final consensus. This allowed us to re-polish approximately 11.6 Gbp of the assembly. The  
238 resulting assembly, Triticum 3.1, has exactly the same contigs and scaffolds (**Table 1**) but has an  
239 improved overall consensus, containing more of the true 31-mers (**Figure 3**). Because of changes

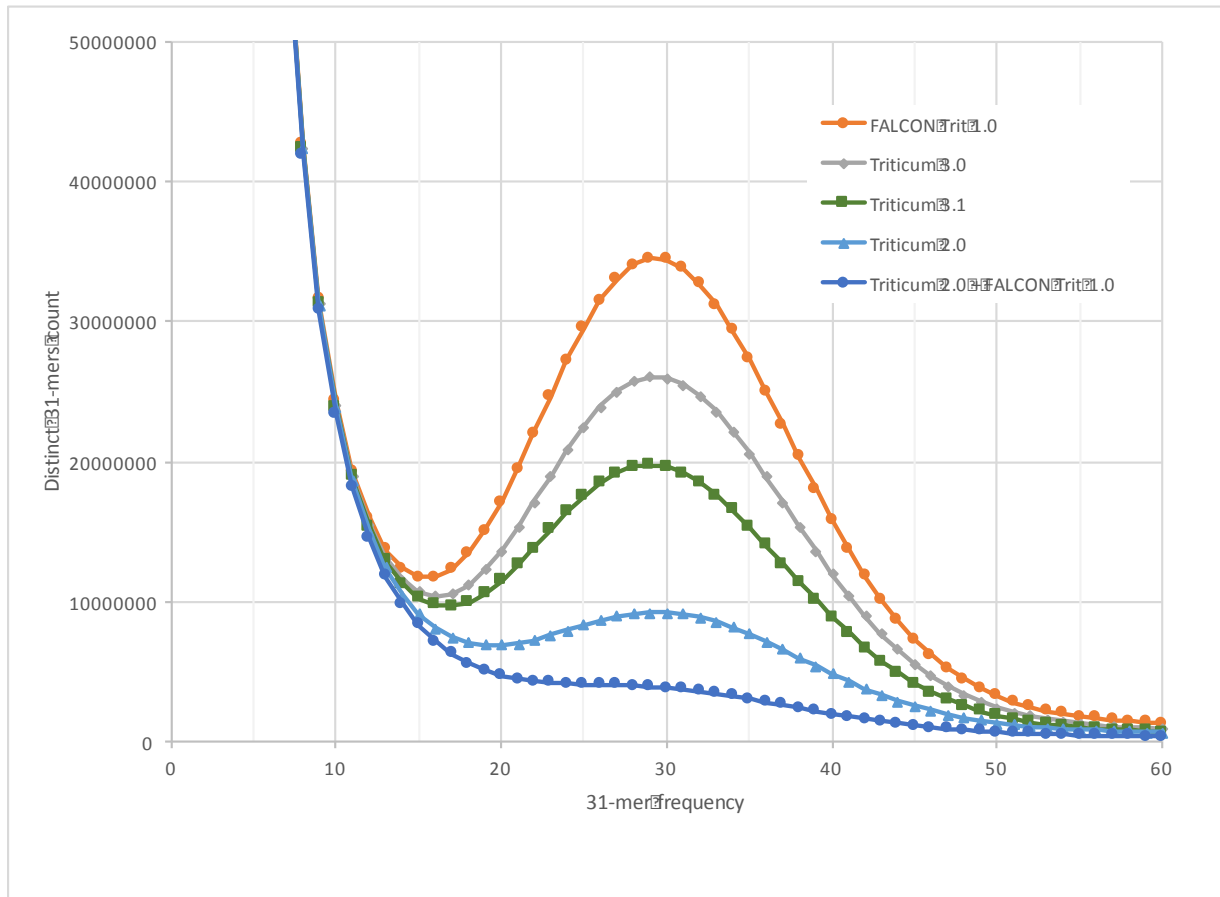

**Figure 3.** Missing 31-mers in the different assemblies of *Triticum aestivum*. Using the Illumina read data from a previously published assembly of the same genome, we counted all 31-mers in the reads, and then plotted how many of these reads are missing from each assembly. The x-axis shows how often the k-mers occur in the reads. The y-axis shows how many distinct k-mers are missing from each assembly. The FALCON Trit 1.0 assembly had the largest number of missing k-mers, while Triticum 2.0 had the fewest.

in the consensus sequence, the 3.1 assembly is very slightly larger as well. To evaluate the possibility of further improvements, we analysed the 31-mer spectra of both FALCON Trit 1.0 and Triticum 2.0 as a single sequence set. We found that this almost completely eliminated the missing 31-mers (**Figure 3**), illustrating that further improvements in the consensus are possible and are planned for future assembly releases.

1  
2  
3  
4  
5  
6  
7  
8  
9  
10  
11  
12  
13  
14  
15  
16  
17  
18  
19  
20  
21  
22  
23  
24  
25  
26  
27  
28  
29  
30  
31  
32  
33  
34  
35  
36  
37  
38  
39  
40  
41  
42  
43  
44  
45  
46  
47  
48  
49  
50  
51  
52  
53  
54  
55  
56  
57  
58  
59  
60  
61  
62  
63  
64  
65

247 **Discussion**

248 In 2004, an international consortium determined that whole-genome shotgun (WGS) sequencing  
249 of hexaploid wheat was simply too difficult, "mainly because of the large size and highly  
250 repetitive nature of the wheat genome" [14]. The consortium instead determined that the  
251 chromosome-by-chromosome approach would be more effective. This strategy, which was far  
252 slower and more costly than WGS sequencing, in the end produced a genome assembly that was  
253 highly fragmented and that contained only 10.2 Gb [2].

254  
255 The assembly described here is the first to successfully reconstruct essentially all of the  
256 hexaploid wheat genome, *Triticum aestivum*, and to produce relatively large contiguous  
257 sequences. The final assembly contains 15,344,693,583 bp with an N50 contig size of 232,659  
258 bp. The previous chromosome-based assembly was not only much smaller overall, but it had  
259 average contig sizes approximately 50 times smaller [2]. A recent whole-genome assembly based  
260 on deep Illumina sequencing contained 2,726,911 contigs spanning 12,658,314,504 bp and had a  
261 contig N50 size of 9731 bp [3]. Compared to Triticum 3.0, that assembly is 2.69 Gb smaller, and  
262 its contigs are 24 times smaller. (Note that in order to provide a fair comparison, all N50 sizes  
263 reported here are based on the same 15.34 Gb total genome size.)

264  
265 Why did previous attempts to assemble *T. aestivum* produce a result that was billions of  
266 nucleotides shorter than the true genome size? The most likely explanation is that the repetitive  
267 sequences, which cover some 90% of the genome [4, 14], are so similar to one another that  
268 genome assembly programs cannot avoid collapsing them together. This is a well-known  
269 problem for genome assembly, particularly when using the short reads produced by next-

1  
2  
3  
4  
5  
6  
7  
8  
9  
10  
11  
12  
13  
14  
15  
16  
17  
18  
19  
20  
21  
22  
23  
24  
25  
26  
27  
28  
29  
30  
31  
32  
33  
34  
35  
36  
37  
38  
39  
40  
41  
42  
43  
44  
45  
46  
47  
48  
49  
50  
51  
52  
53  
54  
55  
56  
57  
58  
59  
60  
61  
62  
63  
64  
65

270 generation sequencing technologies. If the differences between repeats occur at a lower rate than  
271 sequencing errors, then assemblers cannot distinguish them. The result is an assembly that is  
272 both highly fragmented and too short. The same phenomenon can be seen in attempts to  
273 assemble *Ae. tauschii*. from short reads. An assembly of that genome using Illumina and 454  
274 sequencing data, contained only 2.69 Gb and had an N50 contig size of just 2.1 Kb [12]. A  
275 hybrid assembly using both Illumina and PacBio data, reported by our group early in 2017,  
276 produced an assembly of 4.33 Gb, closely matching the estimated genome size, with a contig  
277 N50 size of 487 Kb [6].

278  
279 The key factor in producing a true draft assembly for this exceptionally repetitive genome was  
280 the use of very long reads, averaging just under 10,000 bp each, which were required to span the  
281 long, ubiquitous repeats in the wheat genome. Deep coverage in these reads (36X, or 545 Gb of  
282 raw sequence) coupled with even deeper coverage (65X) in low-error-rate short reads, allowed  
283 us to produce a highly accurate and highly contiguous consensus assembly. The massive data set,  
284 over 1.5 trillion bases, also required an unprecedented amount of computing power to assemble,  
285 and its completion would not have been possible without the availability of very large parallel  
286 computing grids. All together, the various assembly steps took 880,000 CPU hours, or just over  
287 100 CPU years. An important technical note is that the computational cost was not simply a  
288 function of genome size, but more critically a function of its repetitiveness. The presence of large  
289 numbers of unusually long exact and near-exact repeats (Figure 2) means that all of these  
290 sequences overlap one another, leading to a quadratic increase in the number of sequence  
291 alignments that an assembler must consider.

292



1  
2  
3  
4  
5  
6  
7  
8  
9  
10  
11  
12  
13  
14  
15  
16  
17  
18  
19  
20  
21  
22  
23  
24  
25  
26  
27  
28  
29  
30  
31  
32  
33  
34  
35  
36  
37  
38  
39  
40  
41  
42  
43  
44  
45  
46  
47  
48  
49  
50  
51  
52  
53  
54  
55  
56  
57  
58  
59  
60  
61  
62  
63  
64  
65

293 Finally, by aligning this assembly to the draft genome of *Aegilops tauschii*, the progenitor of the  
294 wheat D genome, we were able to cleanly separate the D genome component from the A and B  
295 genomes of hexaploid wheat, which is reported here for the first time. This separation was  
296 possible because *Ae. tauschii* is much closer to wheat D, having diverged approximately 8,000  
297 years ago [14], than either genome is to wheat A or B .

298  
299 The wheat genome presented here provides, for the first time, a near-complete substrate for  
300 future studies of this important food crop. Previous efforts to annotate the genome have been  
301 hampered by the absence of a large proportion of the genome itself, making inferences about  
302 missing genes or gene families difficult, and also by the highly fragmented nature of previous  
303 assemblies, which had average contig sizes under 10 Kb. With over half of the genome now  
304 contained in contigs longer than 232 Kb, the Triticum 3.0 assembly will contain many more  
305 genes within single contigs, greatly aiding future efforts, which are already under way, to study  
306 its gene content, evolution, and relationship to other plant species.

307  
**Availability of data.** The Triticum project data have been deposited at the National Center for  
308 Biotechnology Information (NCBI) under BioProject PRJNA392179. The assembly has been  
309 deposited at DDBJ/ENA/GenBank under the accession NMPL00000000. The version described  
310 in this paper is version NMPL01000000. The PacBio and Illumina reads are available under the  
311 same BioProject. The TriticumD 1.0 contigs are available separately at  
312 [ftp://ftp.ccb.jhu.edu/pub/data/Triticum\\_aestivum/Wheat\\_D\\_genome](ftp://ftp.ccb.jhu.edu/pub/data/Triticum_aestivum/Wheat_D_genome).

314  
**Competing interests statement.** None of the authors have competing or conflicting interests.

1  
2  
3  
4  
5  
6  
7  
8  
9  
10  
11  
12  
13  
14  
15  
16  
17  
18  
19  
20  
21  
22  
23  
24  
25  
26  
27  
28  
29  
30  
31  
32  
33  
34  
35  
36  
37  
38  
39  
40  
41  
42  
43  
44  
45  
46  
47  
48  
49  
50  
51  
52  
53  
54  
55  
56  
57  
58  
59  
60  
61  
62  
63  
64  
65

316

## 317 **Acknowledgements**

318 The authors wish to thank Jan Dvořák for helpful comments on the manuscript. We also  
319 acknowledge the support of the Johns Hopkins University large-scale computing center,  
320 MARCC, which provided invaluable computing resources. This work was supported in part by  
321 the U.S. National Science Foundation under grant IOS-1238231 and IOS-1444893, and by the  
322 U.S. National Institutes of Health under grant R01 HG006677.

323

## 324 **References**

325

- 326 1. Brenchley R., M. Spannagl, M. Pfeifer, G.L. Barker, R. D'Amore, A.M. Allen, ..., and N.  
327 Hall. Analysis of the bread wheat genome using whole-genome shotgun sequencing.  
328 *Nature*, 2012. **491**(7426): 705-10.
- 329 2. International Wheat Genome Sequencing C. A chromosome-based draft sequence of the  
330 hexaploid bread wheat (*Triticum aestivum*) genome. *Science*, 2014. **345**(6194): 1251788.
- 331 3. Clavijo B.J., L. Venturini, C. Schudoma, G.G. Accinelli, G. Kaithakottil, J. Wright, ..., and  
332 M.D. Clark. An improved assembly and annotation of the allohexaploid wheat genome  
333 identifies complete families of agronomic genes and provides genomic evidence for  
334 chromosomal translocations. *Genome Res*, 2017. **27**(5): 885-896.
- 335 4. Li W., P. Zhang, J.P. Fellers, B. Friebe, and B.S. Gill. Sequence composition, organization,  
336 and evolution of the core Triticeae genome. *Plant J*, 2004. **40**(4): 500-11.
- 337 5. Zimin A.V., G. Marcais, D. Puiu, M. Roberts, S.L. Salzberg, and J.A. Yorke. The MaSuRCA  
338 genome assembler. *Bioinformatics*, 2013. **29**(21): 2669-77.
- 339 6. Zimin A.V., D. Puiu, M.C. Luo, T. Zhu, S. Koren, G. Marcais, ..., and S.L. Salzberg. Hybrid  
340 assembly of the large and highly repetitive genome of *Aegilops tauschii*, a progenitor of  
341 bread wheat, with the MaSuRCA mega-reads algorithm. *Genome Res*, 2017. **27**(5): 787-  
342 792.
- 343 7. Myers E.W., G.G. Sutton, A.L. Delcher, I.M. Dew, D.P. Fasulo, M.J. Flanigan, ..., and J.C.  
344 Venter. A whole-genome assembly of *Drosophila*. *Science*, 2000. **287**(5461): 2196-204.
- 345 8. Kurtz S., A. Phillippy, A.L. Delcher, M. Smoot, M. Shumway, C. Antonescu, and S.L.  
346 Salzberg. Versatile and open software for comparing large genomes. *Genome Biol*, 2004.  
347 **5**(2): R12.
- 348 9. Chin C.S., P. Peluso, F.J. Sedlazeck, M. Nattestad, G.T. Concepcion, A. Clum, ..., and M.C.  
349 Schatz. Phased diploid genome assembly with single-molecule real-time sequencing. *Nat*  
350 *Methods*, 2016. **13**(12): 1050-1054.

1  
2  
3  
4  
5  
6  
7  
8  
9  
10  
11  
12  
13  
14  
15  
16  
17  
18  
19  
20  
21  
22  
23  
24  
25  
26  
27  
28  
29  
30  
31  
32  
33  
34  
35  
36  
37  
38  
39  
40  
41  
42  
43  
44  
45  
46  
47  
48  
49  
50  
51  
52  
53  
54  
55  
56  
57  
58  
59  
60  
61  
62  
63  
64  
65

351 10. Chin C.S., D.H. Alexander, P. Marks, A.A. Klammer, J. Drake, C. Heiner, ..., and J. Korlach.  
352 Nonhybrid, finished microbial genome assemblies from long-read SMRT sequencing  
353 data. *Nat Methods*, 2013. **10**(6): 563-9.

354 11. Schatz M.C., A.L. Delcher, and S.L. Salzberg. Assembly of large genomes using second-  
355 generation sequencing. *Genome research*, 2010. **20**(9): 1165-73.

356 12. Jia J., S. Zhao, X. Kong, Y. Li, G. Zhao, W. He, ..., and J. Wang. *Aegilops tauschii* draft  
357 genome sequence reveals a gene repertoire for wheat adaptation. *Nature*, 2013.  
358 **496**(7443): 91-5.

359 13. Mapleson D., G. Garcia Accinelli, G. Kettleborough, J. Wright, and B.J. Clavijo. KAT: a K-  
360 mer analysis toolkit to quality control NGS datasets and genome assemblies.  
361 *Bioinformatics*, 2017. **33**(4): 574-576.

362 14. Gill B.S., R. Appels, A.M. Botha-Oberholster, C.R. Buell, J.L. Bennetzen, B. Chalhoub, ...,  
363 and T. Sasaki. A workshop report on wheat genome sequencing: International Genome  
364 Research on Wheat Consortium. *Genetics*, 2004. **168**(2): 1087-96.  
365

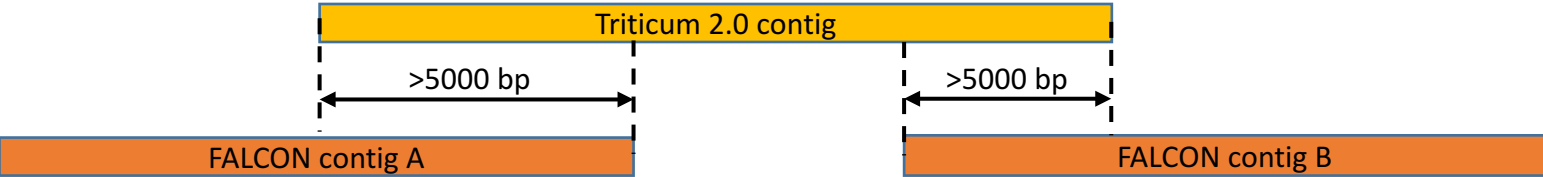

Figure 2. K-mer uniqueness ratios for the wheat genome (*Triticum aestivum*) compared to the cow, fruit fly, rice, loblolly pine, and *Ae. tauschii* genomes.

[Click here to download Figure2-kmer-uniqueness.pdf](#)

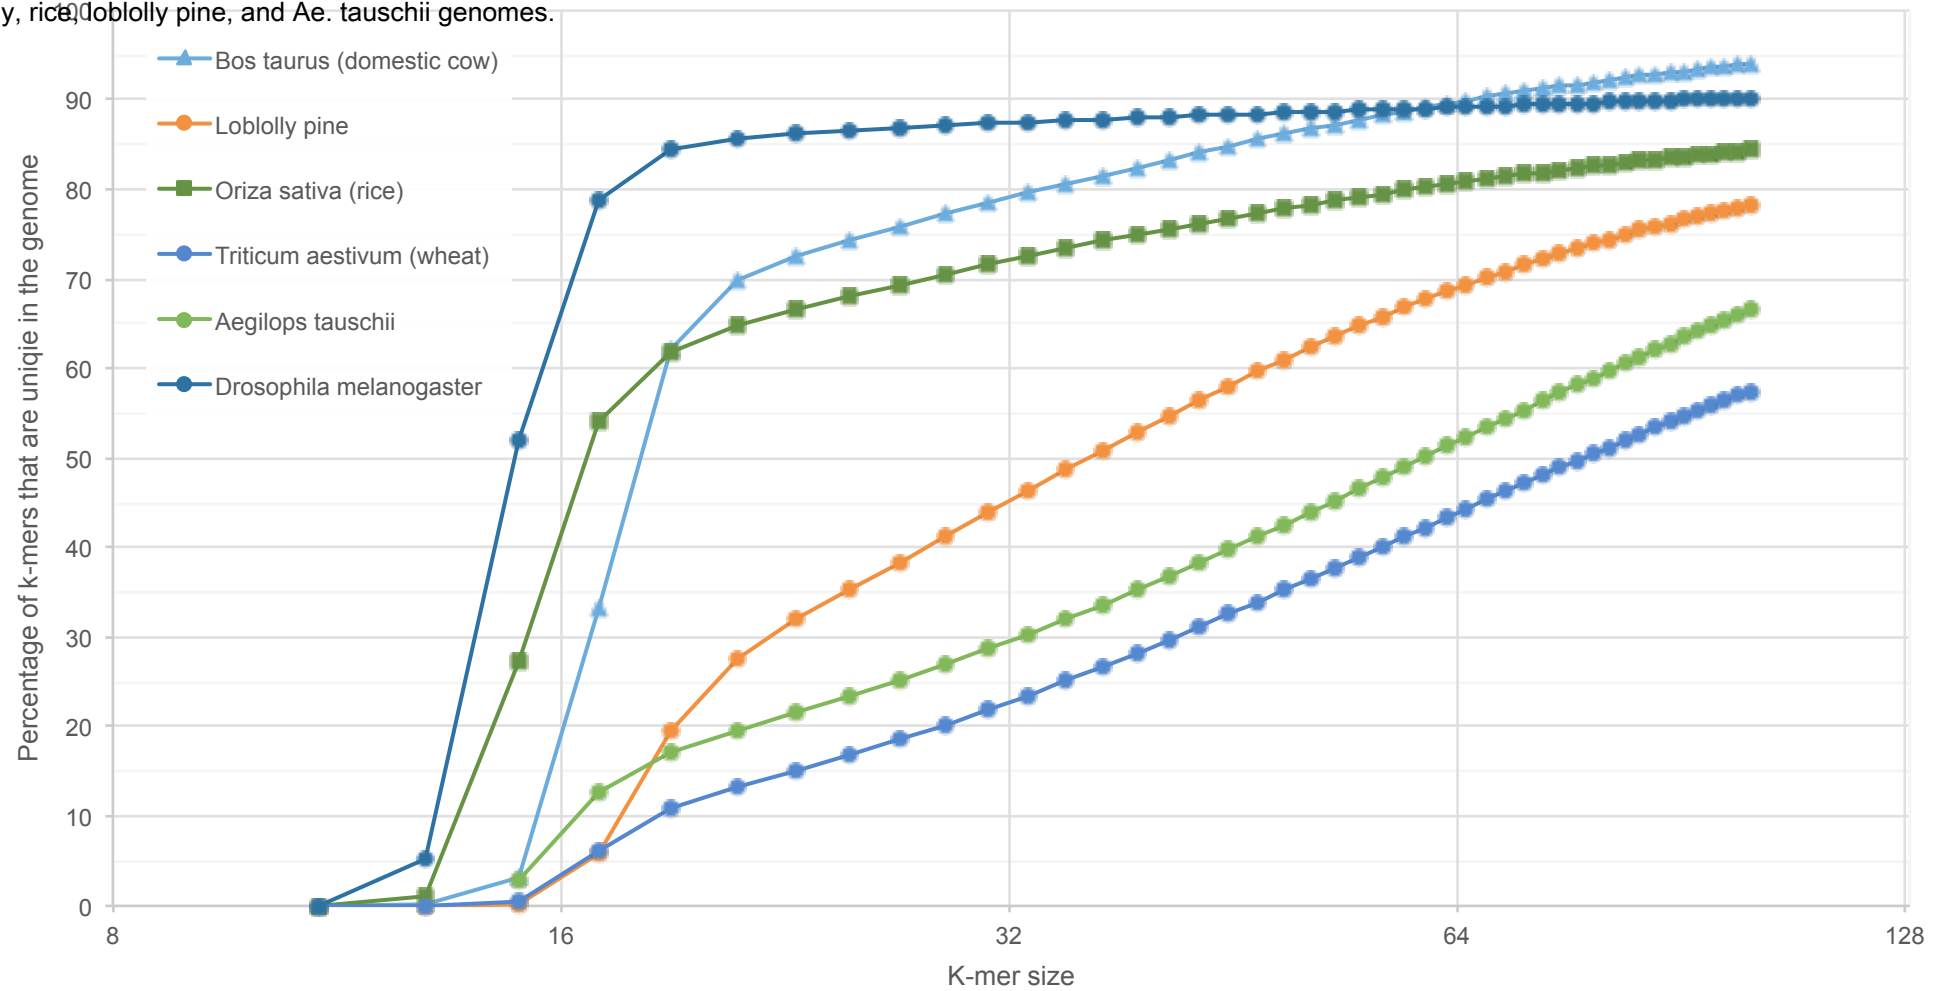

Supplement: gix097_giga-d-17-00164_original-submission.pdf [file gix097_giga-d-17-00164_original-submission.pdf]
