# Supplementary material for: The first near-complete assembly of the hexaploid bread wheat genome, Triticum aestivum
Source: PubMed Central journal article supplement (PMC5691383; doi:10.1093/gigascience/gix097), 2017-10-23
Supplement: gix097_response-to-reviewer-comments_original-submission.pdf [file gix097_response-to-reviewer-comments_original-submission.pdf]

## **Author's Response To Reviewer Comments**

Our responses are in a separately formatted document.
